# Supplementary material for: Sensitivity analysis based on the random forest machine learning algorithm identifies candidate genes for regulation of innate and adaptive immune response of chicken
Source: PubMed Central journal article supplement — Poult Sci. 2020 Sep 12;99(12):6341–54. doi: 10.1016/j.psj.2020.08.059 (PMC7704721; doi:10.1016/j.psj.2020.08.059), 2020-09-12
Supplement: mmc1.pdf [file mmc1.pdf]

1 **Sensitivity analysis based on the Random Forest machine learning**  
2 **algorithm identifies candidate genes for regulation of innate and**  
3 **adaptive immune response of chicken**

4 Aneta Polewko-Klim <sup>\*</sup>, Wojciech Lesiński <sup>\*</sup>, Agnieszka Golińska <sup>\*</sup>,  
5 Krzysztof Mnich <sup>†</sup>, Maria Siwek <sup>‡</sup>, Witold R Rudnicki <sup>\* † §</sup>

6 October 24, 2019

7 **ADDITIONAL TABLES**

8 This supplementary tables contain more detailed description of results.

9 Tables 1, 2, 3 and 4 present detailed results of the cross-validated feature selection  
10 procedure. All SNPs that were ever indicated as relevant for any of the traits in the  
11 cross-validated feature selection for KLH7, LPS, LTA and KLH0, are presented.

12 The additional Table 5 contains the summary of performance of the best Random Forest  
13 models for 3 phenotypic traits (KLH7, LPS and LTA) measured in 1000 repeats of 3-fold  
14 cross-validation.

15 The detailed results for various combinations of genes used for building predictive  
16 models for KLH7 phenotypic trait are given in Tables 6, 7 and 8.

---

<sup>\*</sup>Institute of Informatics, University of Białystok

<sup>†</sup>Computational Centre, University of Białystok

<sup>‡</sup>Animal Biotechnology Department, University of Technology and Life Sciences

<sup>§</sup>Interdisciplinary Centre for Mathematical and Computational Modelling, Warsaw

**Table 1:** SNPs that were selected in multiple runs of feature selection procedure for KLH7.

|         |            |     |            |     |            |     |
|---------|------------|-----|------------|-----|------------|-----|
| 100%    | rs10731333 | 297 | rs14068006 | 297 | rs14072521 | 297 |
|         | rs16102750 | 297 | rs15035880 | 297 | rs15039342 | 297 |
|         | rs15714774 | 297 | rs15725673 | 297 | rs16001483 | 297 |
| > 83.3% | rs15035854 | 296 | rs14105858 | 295 | rs15965697 | 292 |
|         | rs29005402 | 291 | rs16690726 | 285 | rs15008890 | 277 |
|         | rs14075158 | 269 | rs13508431 | 265 | rs15827424 | 261 |
|         | rs15006760 | 257 | rs15005804 | 251 |            |     |
| > 50%   | rs15810344 | 241 | rs14692425 | 238 | rs15826598 | 228 |
|         | rs14071669 | 227 | rs15826603 | 223 | rs14070244 | 203 |
|         | rs16651464 | 201 | rs14777688 | 171 | rs15820319 | 161 |
|         | rs15947324 | 151 |            |     |            |     |
| > 10%   | rs15714740 | 119 | rs13660984 | 92  | rs15943419 | 92  |
|         | rs14110474 | 77  | rs14110445 | 71  | rs15039217 | 68  |
|         | rs13532733 | 49  | rs15723904 | 46  | rs15943775 | 44  |
|         | rs14110239 | 35  |            |     |            |     |
| < 10%   | rs14660338 | 28  | rs15821339 | 28  | rs16776013 | 24  |
|         | rs15001183 | 20  | rs14066122 | 18  | rs14071662 | 9   |
|         | rs14075602 | 7   | rs15946187 | 7   | rs15820855 | 6   |
|         | rs15820342 | 5   | rs13507614 | 3   | rs15820324 | 3   |
|         | rs14659246 | 2   | rs15005761 | 2   | rs16651459 | 2   |

**Table 2:** SNPs that were selected in multiple runs of feature selection procedure for LPS

|       |            |     |            |     |            |     |
|-------|------------|-----|------------|-----|------------|-----|
| 100%  | rs14074824 | 297 | rs14105858 | 297 | rs14110474 | 297 |
|       | rs15035880 | 297 | rs15039217 | 297 | rs15040786 | 297 |
|       | rs15714774 | 297 | rs15826598 | 297 | rs15965697 | 297 |
|       | rs15968294 | 297 | rs16102750 | 297 | rs16666588 | 297 |
| > 85% | rs15810344 | 291 | rs10729486 | 290 | rs14075115 | 290 |
|       | rs15012782 | 283 | rs16776013 | 278 | rs16001483 | 274 |
|       | rs15820319 | 268 | rs14777688 | 264 |            |     |
| > 50% | rs15005804 | 251 | rs13508431 | 249 | rs15827424 | 244 |
|       | rs13507637 | 228 | rs10731333 | 222 | rs13530680 | 194 |
|       | rs14660338 | 188 |            |     |            |     |
| > 10% | rs15946187 | 146 | rs13741184 | 134 | rs15965754 | 125 |
|       | rs14071669 | 117 | rs15826603 | 109 | rs15820342 | 105 |
|       | rs16651257 | 101 | rs14670031 | 85  | rs15820338 | 81  |
|       | rs15732513 | 77  | rs10724273 | 71  | rs16653010 | 58  |
|       | rs14070244 | 55  | rs15005784 | 37  | rs16653011 | 34  |
| < 10% | rs14659200 | 25  | rs16651592 | 22  | rs15725673 | 18  |
|       | rs16653032 | 18  | rs15726281 | 17  | rs14075155 | 14  |
|       | rs15726279 | 14  | rs15734956 | 14  | rs10731518 | 8   |
|       | rs16122989 | 8   | rs14071662 | 6   | rs15008925 | 6   |
|       | rs15821511 | 6   | rs16651523 | 6   | rs13531794 | 3   |
|       | rs14659025 | 3   | rs14669992 | 3   | rs15035854 | 3   |
|       | rs15943407 | 3   |            |     |            |     |

**Table 3:** SNPs that were selected in multiple runs of feature selection procedure for LTA

|       |            |     |            |     |            |     |
|-------|------------|-----|------------|-----|------------|-----|
| 100%  | rs10730793 | 297 | rs14070244 | 297 | rs14072943 | 297 |
|       | rs14110239 | 297 | rs15035880 | 297 | rs15039217 | 297 |
|       | rs15714774 | 297 | rs15725673 | 297 | rs15732513 | 297 |
|       | rs15820338 | 297 | rs15821339 | 297 | rs15826598 | 297 |
|       | rs15943775 | 297 | rs15965697 | 297 | rs16102750 | 297 |
| > 85% | rs15035854 | 296 | rs29005402 | 296 | rs13532735 | 291 |
|       | rs15012782 | 268 | rs14110474 | 264 |            |     |
| > 50% | rs15810344 | 249 | rs14072521 | 243 | rs13660984 | 232 |
|       | rs15040786 | 213 | rs15005761 | 205 | rs15005804 | 199 |
|       | rs14075141 | 198 | rs15726281 | 192 | rs15946187 | 168 |
|       | rs14105858 | 151 |            |     |            |     |
| > 10% | rs16776013 | 143 | rs14071662 | 99  | rs13530680 | 98  |
|       | rs15008890 | 92  | rs15006760 | 89  | rs16651464 | 66  |
|       | rs14659246 | 61  | rs16666588 | 59  | rs13531794 | 49  |
|       | rs15943921 | 44  | rs16651257 | 42  | rs16690726 | 38  |
|       | rs15005784 | 29  |            |     |            |     |
| < 10% | rs14659025 | 20  | rs15035851 | 10  | rs15826603 | 9   |
|       | rs15820326 | 7   | rs15039342 | 6   | rs14777688 | 4   |
|       | rs13508431 | 3   | rs14072536 | 3   | rs14659217 | 3   |
|       | rs14659238 | 3   | rs14692409 | 3   | rs15005789 | 3   |
|       | rs15943777 | 3   | rs14071669 | 2   | rs15820855 | 1   |
|       | rs16001483 | 1   |            |     |            |     |

**Table 4:** SNPs that were selected in multiple runs of feature selection procedure for KLH0

|       |            |     |            |     |            |     |
|-------|------------|-----|------------|-----|------------|-----|
| 100%  | rs10724273 | 297 | rs14072536 | 297 | rs14670031 | 297 |
|       | rs15012782 | 297 | rs15035880 | 297 | rs15039217 | 297 |
|       | rs15040786 | 297 | rs15714774 | 297 | rs15943921 | 297 |
|       | rs15965697 | 297 | rs16102750 | 297 |            |     |
| > 85% | rs13508431 | 295 | rs15827424 | 291 | rs15826603 | 286 |
|       | rs15005789 | 277 | rs13741184 | 262 | rs14105858 | 260 |
|       | rs13507613 | 259 | rs15734956 | 255 | rs15726281 | 251 |
|       | rs16666588 | 251 |            |     |            |     |
| > 50% | rs16651257 | 235 | rs14669992 | 216 | rs10727433 | 205 |
|       | rs16098888 | 205 | rs13507614 | 195 | rs15006760 | 180 |
| > 10% | rs15723904 | 146 | rs14075143 | 144 | rs14070244 | 139 |
|       | rs15943775 | 126 | rs15723913 | 125 | rs15725673 | 120 |
|       | rs13530680 | 96  | rs13507637 | 85  | rs16651464 | 83  |
|       | rs15734948 | 75  | rs14110445 | 66  | rs16653011 | 65  |
|       | rs16653010 | 55  | rs13660984 | 49  | rs15035854 | 42  |
|       | rs15946187 | 33  | rs15810344 | 30  |            |     |
| < 10% | rs15820319 | 28  | rs15826598 | 28  | rs14110496 | 25  |
|       | rs15039467 | 25  | rs13531794 | 22  | rs14066122 | 21  |
|       | rs15723899 | 20  | rs15001183 | 18  | rs14659200 | 13  |
|       | rs14074824 | 12  | rs15820338 | 11  | rs14075115 | 9   |
|       | rs15039474 | 4   | rs15968294 | 3   | rs15008890 | 2   |

**Table 5:** Summary of performance of the best Random Forest models for 3 phenotypic traits measured in 1000 repeats of 3-fold cross-validation.

| Trait | Min.   | 1st Qu. | Median | Mean   | 3rd Qu. | Max.   | Std. dev. |
|-------|--------|---------|--------|--------|---------|--------|-----------|
| KLH7  | 5.78%  | 13.74%  | 15.03% | 14.94% | 16.44%  | 21.81% | 2.13%     |
| LPS   | -7.93% | 3.01%   | 4.52%  | 4.38%  | 6.08%   | 10.91% | 2.44%     |
| LTA   | -5.14% | 6.24%   | 8.03%  | 7.84%  | 9.55%   | 15.61% | 2.50%     |

**Table 6:** Performance of Random Forest models for KLH7, built on genes from group I plus a reduced subset of group II. The best combination is indicated by bold text.

| Genes                   | 1st Qu.       | Median        | Mean          | 3rd Qu.       | Std. dev.    |
|-------------------------|---------------|---------------|---------------|---------------|--------------|
| gr. I                   | 10.78%        | 12.44%        | 12.24%        | 13.88%        | 2.31%        |
| gr. I+II                | 12.86%        | 14.18%        | 14.07%        | 15.53%        | 2.05%        |
| gr. I+PRCKB             | 12.40%        | 13.76%        | 13.74%        | 15.31%        | 2.22%        |
| gr. I+IL9R              | 12.16%        | 13.66%        | 13.56%        | 15.17%        | 2.27%        |
| gr. I+MAP2K3            | 11.41%        | 13.00%        | 12.85%        | 14.43%        | 2.30%        |
| gr. I+CARD11            | 10.72%        | 12.25%        | 12.08%        | 13.73%        | 2.28%        |
| gr. I+ST6GAL1           | 10.49%        | 12.16%        | 11.99%        | 13.61%        | 2.37%        |
| gr. I+PTGER4            | 10.41%        | 11.97%        | 11.77%        | 13.29%        | 2.29%        |
| gr. I+GPC1              | 10.01%        | 11.50%        | 11.32%        | 12.81%        | 2.25%        |
| <b>gr. I+ILR9+PRCKB</b> | <b>13.74%</b> | <b>15.03%</b> | <b>14.94%</b> | <b>16.44%</b> | <b>2.13%</b> |
| gr. I+ILR9+MAP2K3       | 12.49%        | 14.04%        | 13.91%        | 15.49%        | 2.26%        |
| gr. I+CARD11+ILR9       | 12.47%        | 13.83%        | 13.65%        | 15.10%        | 2.15%        |
| gr. I+PRCKB+ST6GAL      | 12.20%        | 13.58%        | 13.53%        | 15.01%        | 2.09%        |
| gr. I+MAP2K3+PRCKB      | 11.81%        | 13.34%        | 13.24%        | 14.69%        | 2.19%        |
| gr. I+PRCKB+PTGER4      | 11.85%        | 13.27%        | 13.19%        | 14.72%        | 2.15%        |
| gr. I+ILR9+ST6GAL       | 11.67%        | 13.16%        | 13.02%        | 14.51%        | 2.22%        |
| gr. I+ILR9+PTGER4       | 11.60%        | 13.08%        | 12.95%        | 14.56%        | 2.18%        |
| gr. I+MAP2K3+PTGER4     | 11.41%        | 12.99%        | 12.84%        | 14.51%        | 2.33%        |
| gr. I+CARD11+PRCKB      | 11.49%        | 12.99%        | 12.85%        | 14.37%        | 2.20%        |
| gr. I+MAP2K3+ST6GAL1    | 11.45%        | 12.88%        | 12.81%        | 14.26%        | 2.15%        |
| gr. I+CARD11+PTGER4     | 11.27%        | 12.78%        | 12.64%        | 14.15%        | 2.16%        |
| gr. I+ILR9+GPC1         | 11.07%        | 12.58%        | 12.44%        | 14.03%        | 2.16%        |
| gr. I+CARD11+ST6GAL1    | 11.26%        | 12.56%        | 12.40%        | 13.82%        | 2.12%        |
| gr. I+GPC1+PRCKB        | 10.83%        | 12.41%        | 12.18%        | 13.81%        | 2.32%        |
| gr. I+MAP2K3+GPC1       | 10.96%        | 12.40%        | 12.25%        | 13.77%        | 2.28%        |
| gr. I+CARD11+GPC1       | 10.60%        | 12.35%        | 12.07%        | 13.69%        | 2.23%        |
| gr. I+CARD11+MAP2K3     | 10.32%        | 11.94%        | 11.83%        | 13.38%        | 2.27%        |
| gr. I+ST6GAL1+PTGER4    | 10.14%        | 11.78%        | 11.60%        | 13.10%        | 2.30%        |
| gr. I+GPC1+PTGER4       | 9.95%         | 11.44%        | 11.38%        | 13.01%        | 2.34%        |
| gr. I+GPC1+ST6GAL       | 9.62%         | 11.03%        | 10.93%        | 12.45%        | 2.15%        |

**Table 7:** Performance of Random Forest models for KLH7, built using genes from group I

| Genes          | 1st Qu. | Median | Mean   | 3rd Qu. | Std. dev. |
|----------------|---------|--------|--------|---------|-----------|
| gr. I          | 10.78%  | 12.44% | 12.24% | 13.88%  | 2.31%     |
| gr. I–UNC13D   | 7.91%   | 9.50%  | 9.41%  | 11.11%  | 2.42%     |
| gr. I–CRLF3    | 4.82%   | 6.64%  | 6.50%  | 8.29%   | 2.52%     |
| gr. I–MAPK8IP3 | 6.32%   | 7.58%  | 7.42%  | 8.84%   | 1.92%     |

**Table 8:** *Performance of Random Forest models for KLH7, built using various combinations of groups of genes*

| Group        | 1st Qu. | Median | Mean   | 3rd Qu. | Std. dev. |
|--------------|---------|--------|--------|---------|-----------|
| gr. I+II+III | 10.12%  | 11.31% | 11.20% | 12.44%  | 1.81%     |
| gr. I        | 10.78%  | 12.44% | 12.24% | 13.88%  | 2.31%     |
| gr. I+II     | 12.86%  | 14.18% | 14.07% | 15.53%  | 2.05%     |
| gr. I+III    | 7.82%   | 9.22%  | 9.13%  | 10.66%  | 2.15%     |
| gr. II       | -1.19%  | 0.73%  | 0.61%  | 2.63%   | 2.81%     |
| gr. III      | -2.23%  | -0.57% | -0.72% | 1.05%   | 2.48%     |
| gr. II+III   | 3.10%   | 4.48%  | 4.37%  | 5.90%   | 2.13%     |
